# Supplementary material
Source: PubMed Central journal article supplement (PMC5660920)
Supplement: NIHMS914662-supplement-1.pdf [file NIHMS914662-supplement-1.pdf]

## A Circadian Genomic Signature Common to Ketamine and Sleep Deprivation in the Anterior Cingulate Cortex

### Supplemental Information

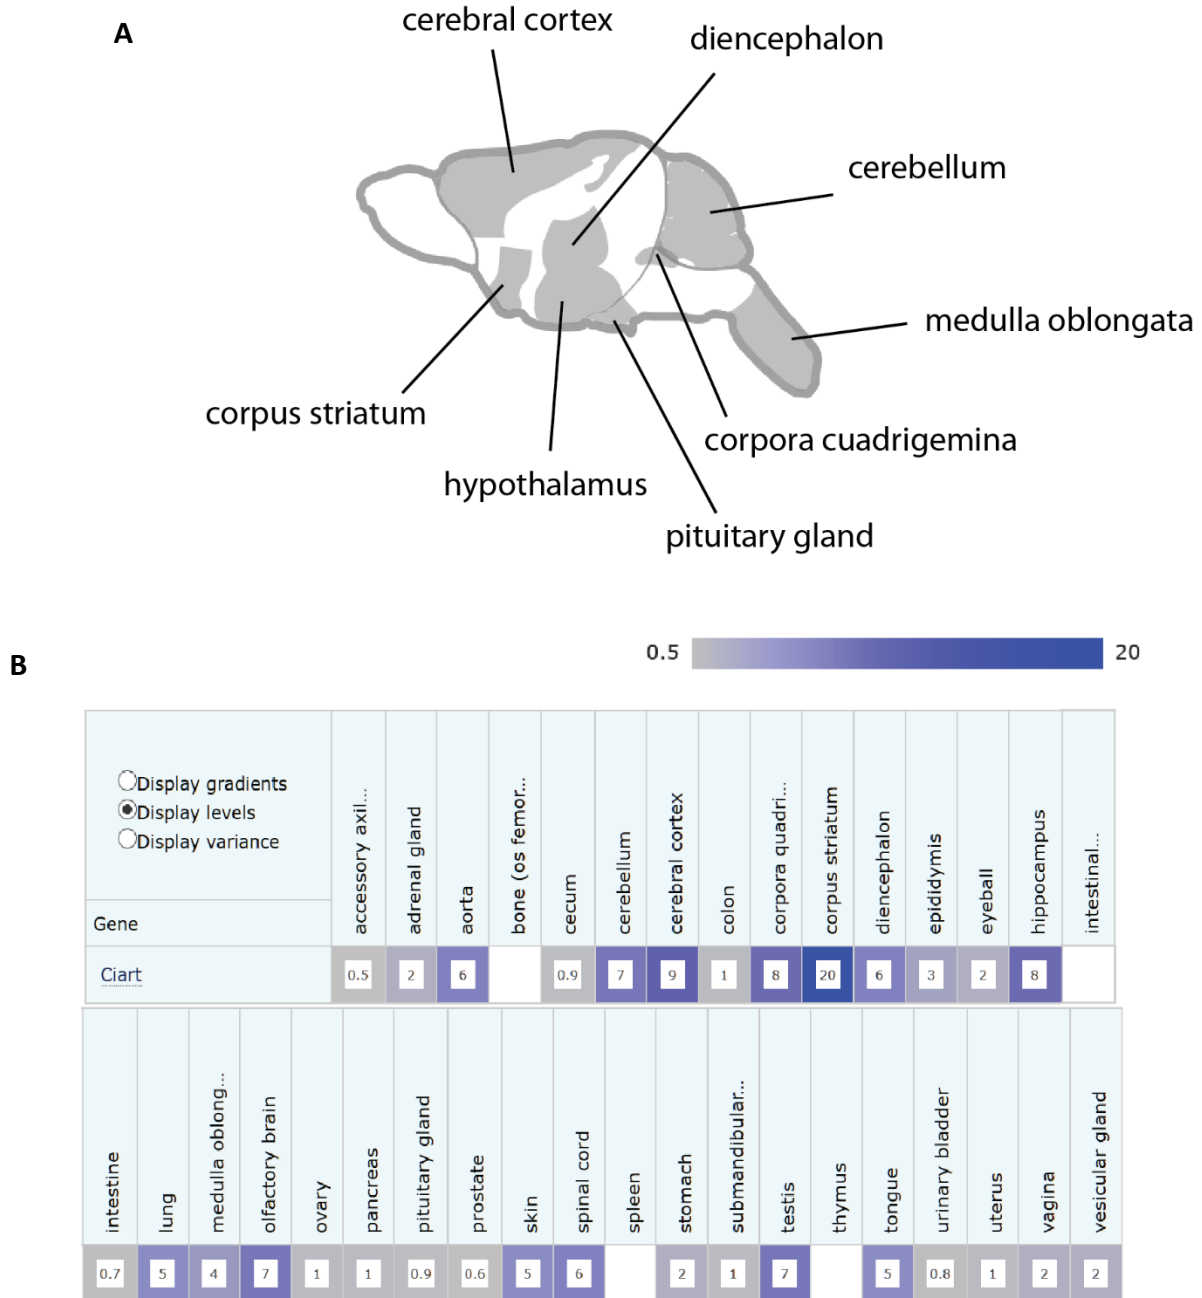

**Supplemental Figure S1.** *Ciart* (CHRONO or GM129) is highly expressed in the cerebral cortex and striatum. Expression levels of the gene *Ciart* in different brain areas and peripheral tissues obtained by RNA-seq. A) Gray brain areas denote expression on the *Ciart* gene. B) Relative expression level on

different brain areas. The color scale represents the RNA expression level. The data was accessed from the Expression Atlas (<https://www.ebi.ac.uk/gxa/home>).

**Supplemental Table S1. Overview of gene expression changes on common 64 genes by ketamine or sleep deprivation treated mice.**

| Symbol        | Description                                                                       | % change SD | % change KT | t-test Sal-SD | t-test Sal-KT | Circadian value (JTK) |          |
|---------------|-----------------------------------------------------------------------------------|-------------|-------------|---------------|---------------|-----------------------|----------|
|               |                                                                                   |             |             |               |               | -log (P)              | -log (q) |
| Syne1         | synaptic nuclear envelope 1                                                       | 6.6         | -24.9       | 0.011         | 0.011         | 7.6                   | 5.8      |
| Lamp2         | lysosomal-associated membrane protein 2                                           | -10.3       | -13.9       | 0.050         | 0.044         | 3.8                   | 2.0      |
| Tlr3          | toll-like receptor 3                                                              | -22.2       | -21.2       | 0.049         | 0.040         | nd                    | nd       |
| Vprbp         | Vpr (HIV-1) binding protein                                                       | 11.4        | 10.2        | 0.048         | 0.047         | nd                    | nd       |
| Ccdc72        | coiled-coil domain containing 72                                                  | -15.6       | -23.6       | 0.046         | 0.024         | 4.0                   | 2.6      |
| LOC100861909  | major urinary protein 2-like                                                      | -33.0       | -45.5       | 0.044         | 0.046         | nd                    | nd       |
| Tob1          | transducer of ErbB-2.1                                                            | -7.6        | -12.2       | 0.043         | 0.016         | 4.9                   | 2.6      |
| 4930567K20Rik | RIKEN cDNA 4930567K20 gene                                                        | -15.5       | -14.8       | 0.042         | 0.001         | 3.1                   | 1.5      |
| Csdc2         | cold shock domain containing C2, RNA binding                                      | 22.4        | 4.8         | 0.041         | 0.013         | 2.9                   | 1.3      |
| Kir3dl1       | killer cell immunoglobulin-like receptor, three domains, long cytoplasmic tail, 1 | -40.3       | -36.4       | 0.041         | 0.018         | nd                    | nd       |
| Fgf1          | fibroblast growth factor 1                                                        | 15.7        | 15.1        | 0.040         | 0.045         | 10.6                  | 10.6     |
| 2900010M23Rik | RIKEN cDNA 2900010M23 gene                                                        | -12.6       | -19.9       | 0.040         | 0.028         | 4.0                   | 2.6      |
| Tlr8          | toll-like receptor 8                                                              | -15.8       | -27.2       | 0.040         | 0.004         | nd                    | nd       |
| Cecr2         | cat eye syndrome chromosome region, candidate 2                                   | -10.6       | -20.2       | 0.040         | 0.001         | 4.2                   | 1.9      |
| Rps12         | ribosomal protein S12                                                             | -9.7        | -12.7       | 0.039         | 0.003         | 3.5                   | 2.0      |
| 1110032A03Rik | RIKEN cDNA 1110032A03 gene                                                        | -9.7        | -12.2       | 0.038         | 0.012         | nd                    | nd       |
| Rps27a        | ribosomal protein S27A                                                            | -11.5       | -12.6       | 0.036         | 0.035         | 3.1                   | 1.8      |
| Ranbp3l       | RAN binding protein 3-like                                                        | -13.2       | -12.1       | 0.036         | 0.039         | 2.6                   | 1.5      |
| Gm129         | Circadian-associated repressor of transcription                                   | -33.1       | -15.6       | 0.035         | 0.004         | 11.5                  | 7.9      |
| Mylk          | myosin, light polypeptide kinase                                                  | -7.5        | -10.8       | 0.034         | 0.037         | nd                    | nd       |
| Gng10         | guanine nucleotide binding protein (G protein), gamma 10                          | -20.6       | -9.5        | 0.033         | 0.001         | 3.0                   | 1.7      |
| Olf194        | olfactory receptor 194                                                            | 32.5        | 29.5        | 0.033         | 0.011         | nd                    | nd       |
| Gm9059        | predicted gene 9059                                                               | 20.6        | 59.7        | 0.033         | 0.034         | nd                    | nd       |
| Rpl37a        | ribosomal protein L37a                                                            | -15.2       | -14.8       | 0.032         | 0.014         | 4.6                   | 2.8      |
| Junb          | Jun-B oncogene                                                                    | -17.4       | -27.5       | 0.032         | 0.008         | 4.7                   | 3.3      |
| Fam82a2       | family with sequence similarity 82, member A2                                     | 16.5        | -15.5       | 0.032         | 0.035         | 5.0                   | 3.3      |
| Tmem229b      | transmembrane protein 229B                                                        | 9.4         | 12.8        | 0.030         | 0.013         | 5.3                   | 2.7      |
| Ssbp3         | single-stranded DNA binding protein 3                                             | 18.1        | 5.5         | 0.029         | 0.023         | 2.7                   | 1.3      |
| Alox15        | arachidonate 15-lipoxygenase                                                      | 18.5        | 22.2        | 0.029         | 0.016         | 5.2                   | 2.7      |
| Gpr183        | G protein-coupled receptor 183                                                    | -8.8        | 5.8         | 0.028         | 0.002         | nd                    | nd       |
| Gm6249        | predicted gene 6249                                                               | 19.0        | 33.3        | 0.028         | 0.019         | nd                    | nd       |
| Mex3b         | mex3 homolog B ( <i>C. elegans</i> )                                              | -15.4       | -15.1       | 0.026         | 0.027         | nd                    | nd       |
| Mir672        | microRNA 672                                                                      | -21.2       | -25.1       | 0.026         | 0.047         | nd                    | nd       |
| Gabrd         | gamma-aminobutyric acid (GABA) A receptor, subunit delta                          | -10.7       | -13.1       | 0.025         | 0.004         | nd                    | nd       |
| Slc31a2       | solute carrier family 31, member 2                                                | 15.4        | 19.7        | 0.025         | 0.006         | 4.6                   | 3.1      |
| 4932441J04Rik | RIKEN cDNA 4932441J04 gene                                                        | -15.8       | -15.3       | 0.025         | 0.033         | nd                    | nd       |
| Snord14e      | small nucleolar RNA, C/D box 14E                                                  | -45.1       | -35.8       | 0.025         | 0.040         | nd                    | nd       |
| Vmn1r200      | vomer nasal 1 receptor 200                                                        | -82.0       | -67.0       | 0.025         | 0.034         | nd                    | nd       |
| 0610007C21Rik | RIKEN cDNA 0610007C21 gene                                                        | -12.8       | -12.5       | 0.024         | 0.042         | 4.3                   | 2.3      |
| Gm20043       | predicted gene, 20043                                                             | 26.6        | 43.0        | 0.023         | 0.037         | nd                    | nd       |

| Symbol        | Description                                                                                   | % change<br>SD | % change<br>KT | t-test<br>Sal-SD | t-test<br>Sal-KT | Circadian value<br>(JTK) |          |
|---------------|-----------------------------------------------------------------------------------------------|----------------|----------------|------------------|------------------|--------------------------|----------|
|               |                                                                                               |                |                |                  |                  | -log (P)                 | -log (q) |
| Cst3          | cystatin C                                                                                    | -7.5           | -7.7           | 0.022            | 0.012            | 4.1                      | 1.8      |
| Rpl23a        | ribosomal protein L23A                                                                        | -11.7          | -10.4          | 0.022            | 0.029            | 2.2                      | 1.4      |
| Clip3         | CAP-GLY domain containing linker protein 3                                                    | 9.5            | 11.3           | 0.021            | 0.011            | nd                       | nd       |
| Olf32         | olfactory receptor 32                                                                         | 42.1           | 61.7           | 0.021            | 0.007            | nd                       | nd       |
| Adams1        | a disintegrin-like and metallopeptidase (reprolysin type) with thrombospondin type 1 motif, 1 | 17.1           | -18.5          | 0.020            | 0.039            | 3.8                      | 2.2      |
| Pcdhb4        | protocadherin beta 4                                                                          | -11.1          | -9.9           | 0.018            | 0.029            | nd                       | nd       |
| Bhlhe41       | basic helix-loop-helix family, member e41                                                     | -21.2          | -14.0          | 0.018            | 0.030            | 8.0                      | 5.2      |
| Sec61b        | Sec61 beta subunit                                                                            | -19.0          | -18.7          | 0.017            | 0.015            | 3.4                      | 2.1      |
| Mir669k       | microRNA 669k                                                                                 | -25.6          | -26.6          | 0.015            | 0.007            | nd                       | nd       |
| 6030419C18Rik | RIKEN cDNA 6030419C18 gene                                                                    | 7.8            | -10.9          | 0.011            | 0.012            | 2.5                      | 1.5      |
| Chrn2         | cholinergic receptor, nicotinic, beta polypeptide 2 (neuronal)                                | -11.8          | -4.7           | 0.013            | 0.055            | 3.6                      | 2.0      |
| Gm17756       | predicted gene, 17756                                                                         | 25.4           | 13.5           | 0.010            | 0.048            | nd                       | nd       |
| Lrrc2         | leucine rich repeat containing 2                                                              | -12.3          | -6.8           | 0.010            | 0.034            | 4.1                      | 2.1      |
| Pigp          | phosphatidylinositol glycan anchor biosynthesis, class P                                      | -7.5           | -15.6          | 0.009            | 0.050            | nd                       | nd       |
| Pitx1         | paired-like homeodomain transcription factor 1                                                | -15.8          | -16.1          | 0.009            | 0.033            | nd                       | nd       |
| Zfp58         | zinc finger protein 58                                                                        | -13.0          | -12.9          | 0.008            | 0.007            | nd                       | nd       |
| Fos           | FBJ osteosarcoma oncogene                                                                     | -23.9          | -25.9          | 0.008            | 0.007            | 5.3                      | 2.3      |
| Gm8158        | predicted gene 8158                                                                           | -9.6           | -10.2          | 0.004            | 0.039            | nd                       | nd       |
| Mup4          | major urinary protein 4                                                                       | 462.1          | 437.1          | 0.003            | 0.046            | 3.3                      | 1.8      |
| Grc10         | gene rich cluster, C10 gene                                                                   | -8.4           | -5.9           | 0.001            | 0.040            | 3.2                      | 1.8      |
| Shd           | src homology 2 domain-containing transforming protein D                                       | -22.2          | -12.1          | 0.000            | 0.007            | nd                       | nd       |
| Ammecr1l      | AMME chromosomal region gene 1-like                                                           | 14.4           | -8.0           | 0.042            | 0.020            | 2.9                      | 1.5      |
| Gm10408       | predicted gene 10408                                                                          | -11.5          | -13.7          | 0.045            | 0.017            | nd                       | nd       |
| Hist2h3b      | histone cluster 2, H3b                                                                        | -37.4          | -39.3          | 0.047            | 0.005            | 11.3                     | 9.0      |

**Supplemental Table S2. Overview of gene expression changes in the cingulate cortex of ketamine and sleep deprivation treated mice.**

| Symbol                            | Description                                                                            | % change<br>SD | % change<br>KT | t-test<br>Sal-SD | t-test<br>Sal-KT | Circadian value<br>(JTK) |          |
|-----------------------------------|----------------------------------------------------------------------------------------|----------------|----------------|------------------|------------------|--------------------------|----------|
|                                   |                                                                                        |                |                |                  |                  | -log (P)                 | -log (q) |
| <b>Nervous system development</b> |                                                                                        |                |                |                  |                  |                          |          |
| Mef2c                             | myocyte enhancer factor 2C                                                             | -9.7           | -7.2           | 0.022            | 0.189            | ns                       | ns       |
| Ina                               | internexin neuronal intermediate filament protein, alpha                               | 16.6           | 0.9            | 0.021            | 0.865            | 4.6                      | 1.9      |
| Nrp1                              | neuropilin 1                                                                           | 29.3           | 0.5            | 0.011            | 0.956            | 4.2                      | 2.4      |
| Mdga1                             | MAM domain containing glycosylphosphatidylinositol anchor 1                            | 42.8           | 0.6            | 0.002            | 0.945            | ns                       | ns       |
| Scn2a1                            | sodium channel, voltage-gated, type II, alpha 1                                        | -9.7           | -4.1           | 0.007            | 0.385            | 3.8                      | 2.2      |
| Ttll7                             | tubulin tyrosine ligase-like family, member 7                                          | -15.0          | -7.9           | 0.029            | 0.232            | ns                       | ns       |
| Nrxn1                             | neurexin I                                                                             | -9.1           | -5.4           | 0.018            | 0.063            | 4.3                      | 1.8      |
| Sufu                              | suppressor of fused homolog (Drosophila)                                               | 10.5           | 2.7            | 0.047            | 0.374            | 4.1                      | 2.7      |
| Slc11a2                           | solute carrier family 11 (proton-coupled divalent metal ion transporters), member 2    | -9.3           | -11.5          | 0.019            | 0.050            | 4.3                      | 3.0      |
| Pfn1                              | profilin 1                                                                             | 16.1           | 8.3            | 0.042            | 0.092            | 3.1                      | 1.7      |
| Myt1l                             | myelin transcription factor 1-like                                                     | 10.9           | -4.4           | 0.026            | 0.307            | 2.2                      | 1.4      |
| Epha7                             | Eph receptor A7                                                                        | -11.3          | -17.3          | 0.038            | 0.149            | 2.8                      | 1.5      |
| Slitrk4                           | SLIT and NTRK-like family, member 4                                                    | -12.5          | -3.6           | 0.028            | 0.669            | ns                       | ns       |
| Btg2                              | B cell translocation gene 2, anti-proliferative                                        | -25.7          | -12.1          | 0.038            | 0.185            | 4.4                      | 1.9      |
| Sema7a                            | sema domain, immunoglobulin domain (Ig), and GPI membrane anchor, (semaphorin) 7A      | 13.8           | -6.7           | 0.014            | 0.366            | 4.0                      | 2.4      |
| Sema3e                            | sema domain, immunoglobulin domain (Ig), short basic domain, secreted, (semaphorin) 3E | 29.2           | -1.2           | 0.007            | 0.945            | 4.9                      | 2.2      |
| Myo16                             | myosin XVI                                                                             | -28.2          | -15.4          | 0.035            | 0.090            | ns                       | ns       |
| Etv1                              | ets variant gene 1                                                                     | -23.9          | -3.8           | 0.007            | 0.603            | 5.0                      | 3.1      |
| Cntn4                             | contactin 4                                                                            | -13.4          | -10.4          | 0.020            | 0.123            | 3.5                      | 1.7      |
| Chrn2                             | cholinergic receptor, nicotinic, beta polypeptide 2 (neuronal)                         | -11.8          | -4.7           | 0.013            | 0.055            | 3.6                      | 2.0      |
| Fgf5                              | fibroblast growth factor 5                                                             | -0.3           | -16.2          | 0.970            | 0.004            | ns                       | ns       |
| Ush1g                             | Usher syndrome 1G                                                                      | 1.1            | 24.1           | 0.883            | 0.006            | ns                       | ns       |
| Nr2e1                             | nuclear receptor subfamily 2, group E, member 1                                        | -4.9           | -18.1          | 0.635            | 0.031            | 5.1                      | 2.3      |
| Ttc3                              | tetratricopeptide repeat domain 3                                                      | -3.0           | -7.1           | 0.178            | 0.010            | 2.9                      | 1.6      |
| Ckb                               | creatine kinase, brain                                                                 | -4.9           | -9.0           | 0.210            | 0.001            | 5.0                      | 3.1      |
| Otp                               | orthopedia homolog (Drosophila)                                                        | 1.8            | 12.7           | 0.768            | 0.040            | 3.1                      | 1.7      |
| Lamb2                             | laminin, beta 2                                                                        | 5.1            | -6.4           | 0.123            | 0.035            | 3.8                      | 1.6      |
| Hoxa3                             | homeobox A3                                                                            | -9.8           | 15.9           | 0.432            | 0.037            | ns                       | ns       |
| Bag1                              | BCL2-associated athanogene 1                                                           | -6.1           | -18.1          | 0.390            | 0.013            | 4.6                      | 2.8      |
| Crb1                              | crumbs homolog 1 (Drosophila)                                                          | 9.9            | 20.9           | 0.169            | 0.012            | 2.3                      | 1.4      |
| Atg7                              | autophagy related 7                                                                    | 4.8            | 4.2            | 0.528            | 0.036            | 2.9                      | 1.8      |
| Tlx2                              | T cell leukemia, homeobox 2                                                            | 2.9            | 18.4           | 0.781            | 0.032            | 2.7                      | 1.6      |
| Etv4                              | ets variant gene 4 (E1A enhancer binding protein, E1AF)                                | -5.1           | 9.3            | 0.472            | 0.003            | ns                       | ns       |
| Tes                               | testis derived transcript                                                              | 0.5            | -17.7          | 0.948            | 0.045            | 3.8                      | 2.0      |
| Dvl2                              | dishevelled 2, dsh homolog (Drosophila)                                                | -4.0           | 8.6            | 0.581            | 0.007            | 3.5                      | 1.9      |
| Irs2                              | insulin receptor substrate 2                                                           | 14.2           | -16.8          | 0.156            | 0.006            | 4.3                      | 2.5      |
| Scd2                              | stearoyl-Coenzyme A desaturase 2                                                       | 1.0            | 9.2            | 0.786            | 0.000            | 6.8                      | 4.3      |
| Nkx2-6                            | NK2 transcription factor related, locus 6 (Drosophila)                                 | 19.1           | 6.7            | 0.125            | 0.684            | 2.9                      | 1.7      |
| Foxa1                             | forkhead box A1                                                                        | -0.2           | 26.9           | 0.988            | 0.045            | ns                       | ns       |
| Grin1                             | glutamate receptor, ionotropic, NMDA1 (zeta 1)                                         | -0.8           | -3.8           | 0.632            | 0.000            | 3.3                      | 1.4      |
| Efnb2                             | ephrin B2                                                                              | -5.5           | -8.2           | 0.115            | 0.013            | ns                       | ns       |
| Sphk1                             | sphingosine kinase 1                                                                   | 9.4            | 15.9           | 0.450            | 0.011            | 4.2                      | 2.5      |
| Emx2                              | empty spiracles homolog 2 (Drosophila)                                                 | -3.5           | -14.7          | 0.747            | 0.025            | ns                       | ns       |
| Neurog1                           | neurogenin 1                                                                           | -21.1          | 35.3           | 0.229            | 0.005            | 2.9                      | 1.4      |
| Dll1                              | delta-like 1 (Drosophila)                                                              | -2.3           | 12.8           | 0.780            | 0.114            | ns                       | ns       |
| Nkx6-1                            | NK6 homeobox 1                                                                         | 8.7            | 22.0           | 0.170            | 0.012            | 4.7                      | 2.2      |
| Tacc2                             | transforming, acidic coiled-coil containing protein 2                                  | 3.9            | -6.0           | 0.700            | 0.016            | 5.3                      | 3.3      |

| Symbol                                                                 | Description                                                 | % change<br>SD | % change<br>KT | t-test<br>Sal-SD | t-test<br>Sal-KT | Circadian value<br>(JTK) |          |
|------------------------------------------------------------------------|-------------------------------------------------------------|----------------|----------------|------------------|------------------|--------------------------|----------|
|                                                                        |                                                             |                |                |                  |                  | -log (P)                 | -log (q) |
| Pcdh18                                                                 | protocadherin 18                                            | -1.0           | -7.1           | 0.519            | 0.023            | 5.1                      | 3.1      |
| Hes1                                                                   | hairy and enhancer of split 1 (Drosophila)                  | 13.3           | -9.1           | 0.200            | 0.033            | 2.2                      | 1.4      |
| Hoxb3                                                                  | homeobox B3                                                 | 9.5            | 17.8           | 0.493            | 0.288            | ns                       | ns       |
| Eya1                                                                   | eyes absent 1 homolog (Drosophila)                          | -6.5           | -9.4           | 0.306            | 0.005            | 5.8                      | 3.7      |
| Hes5                                                                   | hairy and enhancer of split 5 (Drosophila)                  | -3.7           | 23.2           | 0.665            | 0.032            | ns                       | ns       |
| Zic5                                                                   | zinc finger protein of the cerebellum 5                     | -4.9           | 2.9            | 0.505            | 0.652            | ns                       | ns       |
| Cx3cr1                                                                 | chemokine (C-X3-C) receptor 1                               | 0.7            | 4.7            | 0.881            | 0.027            | 3.9                      | 2.3      |
| Bmp7                                                                   | bone morphogenetic protein 7                                | -2.1           | -7.1           | 0.621            | 0.003            | 3.0                      | 1.9      |
| Lrp2                                                                   | low density lipoprotein receptor-related protein 2          | 4.1            | 14.9           | 0.646            | 0.010            | 3.3                      | 1.8      |
| Tbx19                                                                  | T-box 19                                                    | -3.8           | 18.1           | 0.683            | 0.027            | 5.1                      | 2.7      |
| <b>Transmembran receptor protein tyrosine kinase signaling pathway</b> |                                                             |                |                |                  |                  |                          |          |
| Epha7                                                                  | Eph receptor A7                                             | -11.3          | -17.3          | 0.038            | 0.149            | 2.8                      | 1.5      |
| Epha6                                                                  | Eph receptor A6                                             | -19.9          | -9.6           | 0.011            | 0.174            | 5.7                      | 2.6      |
| Nrp1                                                                   | neuropilin 1                                                | 29.3           | 0.5            | 0.011            | 0.956            | 4.2                      | 2.4      |
| Sorbs1                                                                 | sorbin and SH3 domain containing 1                          | 18.2           | 2.5            | 0.033            | 0.601            | 11.2                     | 8.9      |
| Flt3                                                                   | FMS-like tyrosine kinase 3                                  | -13.3          | -8.1           | 0.013            | 0.372            | 2.8                      | 1.6      |
| Epha8                                                                  | Eph receptor A8                                             | -14.6          | 2.1            | 0.010            | 0.511            | ns                       | ns       |
| Grb2                                                                   | growth factor receptor bound protein 2                      | 12.8           | 1.4            | 0.048            | 0.761            | ns                       | ns       |
| Ctgf                                                                   | connective tissue growth factor                             | 13.8           | -0.8           | 0.045            | 0.858            | 10.2                     | 6.8      |
| Zfand5                                                                 | zinc finger, AN1-type domain 5                              | -7.8           | -8.2           | 0.059            | 0.046            | 4.8                      | 2.9      |
| Ddr1                                                                   | discoidin domain receptor family, member 1                  | -17.6          | -10.1          | 0.031            | 0.013            | ns                       | ns       |
| Fgf5                                                                   | fibroblast growth factor 5                                  | -0.3           | -16.2          | 0.970            | 0.004            | ns                       | ns       |
| Irs2                                                                   | insulin receptor substrate 2                                | 14.2           | -16.8          | 0.156            | 0.006            | 4.3                      | 2.5      |
| Musk                                                                   | muscle, skeletal, receptor tyrosine kinase                  | -13.2          | 25.2           | 0.051            | 0.018            | ns                       | ns       |
| Csrnp1                                                                 | cysteine-serine-rich nuclear protein 1                      | 10.6           | -25.9          | 0.425            | 0.048            | 3.6                      | 1.6      |
| Tiparp                                                                 | TCDD-inducible poly(ADP-ribose) polymerase                  | -10.7          | -30.9          | 0.414            | 0.014            | 4.6                      | 2.2      |
| Angpt1                                                                 | angiopoietin 1                                              | -17.6          | -4.7           | 0.171            | 0.734            | 2.7                      | 1.3      |
| Zfp640                                                                 | zinc finger protein 640 // zinc finger protein 640          | 60.7           | -80.4          | 0.515            | 0.009            | ns                       | ns       |
| Fgf4                                                                   | fibroblast growth factor 4                                  | -2.1           | 15.1           | 0.764            | 0.018            | 3.1                      | 1.7      |
| <b>Cell motion</b>                                                     |                                                             |                |                |                  |                  |                          |          |
| Epha7                                                                  | Eph receptor A7                                             | -11.3          | -17.3          | 0.038            | 0.149            | 2.8                      | 1.5      |
| Nrp1                                                                   | neuropilin 1                                                | 29.3           | 0.5            | 0.011            | 0.956            | 4.2                      | 2.4      |
| Ctgf                                                                   | connective tissue growth factor                             | 13.8           | -0.8           | 0.045            | 0.858            | 10.2                     | 6.8      |
| Mdga1                                                                  | MAM domain containing glycosylphosphatidylinositol anchor 1 | 42.8           | 0.6            | 0.002            | 0.945            | ns                       | ns       |
| Etv1                                                                   | ets variant gene 1                                          | -23.9          | -3.8           | 0.007            | 0.603            | 5.0                      | 3.1      |
| Nup85                                                                  | nucleoporin 85                                              | 8.7            | -0.7           | 0.031            | 0.860            | 3.4                      | 2.2      |
| Cx3cl1                                                                 | chemokine (C-X3-C motif) ligand 1                           | 16.1           | 1.3            | 0.017            | 0.703            | 4.3                      | 2.3      |
| Itga4                                                                  | integrin alpha 4                                            | -16.2          | -8.6           | 0.030            | 0.234            | ns                       | ns       |
| Scg2                                                                   | secretogranin II                                            | 31.3           | -7.5           | 0.005            | 0.149            | ns                       | ns       |
| Elmo1                                                                  | engulfment and cell motility 1, ced-12 homolog (C. elegans) | 8.8            | -2.4           | 0.032            | 0.677            | 5.3                      | 2.3      |
| Zfand5                                                                 | zinc finger, AN1-type domain 5                              | -7.8           | -8.2           | 0.059            | 0.046            | 4.8                      | 2.9      |
| Apoa1                                                                  | apolipoprotein A-I                                          | 16.7           | 20.9           | 0.293            | 0.023            | ns                       | ns       |
| Nup62                                                                  | nucleoporin 62                                              | 6.6            | 8.8            | 0.326            | 0.005            | 10.9                     | 8.6      |
| Emx2                                                                   | empty spiracles homolog 2 (Drosophila)                      | -3.5           | -14.7          | 0.747            | 0.025            | ns                       | ns       |
| Cx3cr1                                                                 | chemokine (C-X3-C) receptor 1                               | 0.7            | 4.7            | 0.881            | 0.027            | 3.9                      | 2.3      |
| Myh9                                                                   | myosin, heavy polypeptide 9, non-muscle                     | 16.8           | -13.4          | 0.178            | 0.023            | ns                       | ns       |
| Bmp7                                                                   | bone morphogenetic protein 7                                | -2.1           | -7.1           | 0.621            | 0.003            | 3.0                      | 1.9      |
| Zfp640                                                                 | zinc finger protein 640 // zinc finger protein 640          | 60.7           | -80.4          | 0.515            | 0.009            | ns                       | ns       |
| Nr2e1                                                                  | nuclear receptor subfamily 2, group E, member 1             | -4.9           | -18.1          | 0.635            | 0.031            | 5.1                      | 2.3      |
| Tnp2                                                                   | transition protein 2 // transition protein 2                | 6.3            | 31.9           | 0.304            | 0.012            | 4.4                      | 2.2      |
| Etv4                                                                   | ets variant gene 4 (E1A enhancer binding protein, E1AF)     | -5.1           | 9.3            | 0.472            | 0.003            | ns                       | ns       |

| Symbol                                                       | Description                                                                         | % change<br>SD | % change<br>KT | t-test<br>Sal-SD | t-test<br>Sal-KT | Circadian value<br>(JTK) |          |
|--------------------------------------------------------------|-------------------------------------------------------------------------------------|----------------|----------------|------------------|------------------|--------------------------|----------|
|                                                              |                                                                                     |                |                |                  |                  | -log (P)                 | -log (q) |
| Tes                                                          | testis derived transcript                                                           | 0.5            | -17.7          | 0.948            | 0.045            | 3.8                      | 2.0      |
| <b>Cholinergic synapse</b>                                   |                                                                                     |                |                |                  |                  |                          |          |
| Camk2g                                                       | calcium/calmodulin-dependent protein kinase II gamma                                | -10.0          | -5.8           | 0.000            | 0.146            | 11.5                     | 7.9      |
| Camk4                                                        | calcium/calmodulin-dependent protein kinase IV                                      | -9.4           | -10.9          | 0.053            | 0.219            | ns                       | ns       |
| Chrn2                                                        | cholinergic receptor, nicotinic, beta polypeptide 2 (neuronal)                      | -11.8          | -4.7           | 0.013            | 0.057            | 3.6                      | 2.0      |
| Creb3l3                                                      | cAMP responsive element binding protein 3-like 3                                    | 4.2            | 29.9           | 0.770            | 0.040            | 3.4                      | 2.2      |
| Fos                                                          | FBJ osteosarcoma oncogene                                                           | -23.9          | -25.9          | 0.008            | 0.007            | 5.3                      | 2.3      |
| Gng3                                                         | guanine nucleotide binding protein (G protein), gamma 3                             | -4.7           | 12.8           | 0.510            | 0.077            | 2.2                      | 1.4      |
| Itp2                                                         | inositol 1,4,5-triphosphate receptor 2                                              | -0.4           | -7.1           | 0.961            | 0.031            | 5.1                      | 3.4      |
| Kcnj3                                                        | potassium inwardly-rectifying channel, subfamily J, member 3                        | -13.2          | -4.0           | 0.003            | 0.442            | 6.8                      | 4.4      |
| Kcnq2                                                        | potassium voltage-gated channel, subfamily Q, member 2                              | 16.1           | -1.1           | 0.063            | 0.732            | ns                       | ns       |
| Kcnq4                                                        | potassium voltage-gated channel, subfamily Q, member 4                              | -5.1           | 14.5           | 0.059            | 0.022            | ns                       | ns       |
| Kcnq5                                                        | potassium voltage-gated channel, subfamily Q, member 5                              | -6.4           | -7.0           | 0.049            | 0.199            | 2.9                      | 1.7      |
| Pik3r2                                                       | phosphatidylinositol 3-kinase, regulatory subunit, polypeptide 2 (p85 beta)         | -4.2           | -7.8           | 0.518            | 0.006            | 3.3                      | 1.8      |
| Plcb4                                                        | phospholipase C, beta 4                                                             | -9.8           | -13.3          | 0.072            | 0.181            | 5.5                      | 3.5      |
| <b>Cell morphogenesis involved in neuron differentiation</b> |                                                                                     |                |                |                  |                  |                          |          |
| 3110039M20Rik                                                | RIKEN cDNA 3110039M20 gene                                                          | 17.2           | -4.2           | 0.012            | 0.602            | ns                       | ns       |
| Slc11a2                                                      | solute carrier family 11 (proton-coupled divalent metal ion transporters), member 2 | -9.3           | -11.5          | 0.019            | 0.050            | 5.4                      | 3.1      |
| Slitrk4                                                      | SLIT and NTRK-like family, member 4                                                 | -12.5          | -3.6           | 0.028            | 0.669            | ns                       | ns       |
| Epha7                                                        | Eph receptor A7                                                                     | -11.3          | -17.3          | 0.038            | 0.149            | 2.8                      | 1.5      |
| Nrp1                                                         | neuropilin 1                                                                        | 29.3           | 0.5            | 0.011            | 0.956            | 4.2                      | 2.4      |
| Etv1                                                         | ets variant gene 1                                                                  | -23.9          | -3.8           | 0.007            | 0.603            | 5.0                      | 3.1      |
| Chrn2                                                        | cholinergic receptor, nicotinic, beta polypeptide 2 (neuronal)                      | -11.8          | -4.7           | 0.013            | 0.057            | 4.4                      | 2.2      |
| Hes1                                                         | hairy and enhancer of split 1 (Drosophila)                                          | 13.3           | -9.1           | 0.200            | 0.033            | 2.2                      | 1.4      |
| Lamb2                                                        | laminin, beta 2                                                                     | 5.1            | -6.4           | 0.123            | 0.035            | 3.8                      | 1.6      |
| Bmp7                                                         | bone morphogenetic protein 7                                                        | -2.1           | -7.1           | 0.621            | 0.003            | 3.0                      | 1.9      |
| Nr2e1                                                        | nuclear receptor subfamily 2, group E, member 1                                     | -4.9           | -18.1          | 0.635            | 0.031            | 5.1                      | 2.3      |
| Etv4                                                         | ets variant gene 4 (E1A enhancer binding protein, E1AF)                             | -5.1           | 9.3            | 0.472            | 0.003            |                          |          |
| <b>Notch signaling pathway</b>                               |                                                                                     |                |                |                  |                  |                          |          |
| Dvl2                                                         | dishevelled 2, dsh homolog (Drosophila)                                             | -4.0           | 8.6            | 0.581            | 0.007            | 3.5                      | 1.9      |
| Hes1                                                         | hairy and enhancer of split 1 (Drosophila)                                          | 13.3           | -9.1           | 0.200            | 0.033            | 2.2                      | 1.4      |
| Notch2                                                       | notch 2                                                                             | -2.1           | -11.6          | 0.800            | 0.022            | 3.9                      | 2.1      |
| Mfng                                                         | MFNG O-fucosylpeptide 3-beta-N-acetylglucosaminyltransferase                        | -16.0          | 6.7            | 0.038            | 0.551            | 4.5                      | 2.1      |
| Hes5                                                         | hairy and enhancer of split 5 (Drosophila)                                          | -3.7           | 23.2           | 0.665            | 0.032            | ns                       | ns       |
| Aph1a                                                        | anterior pharynx defective 1a homolog (C. elegans)                                  | 9.8            | -2.7           | 0.681            | 0.815            | 5.2                      | 3.7      |
| Dll1                                                         | delta-like 1 (Drosophila)                                                           | -2.3           | 12.8           | 0.780            | 0.114            | ns                       | ns       |
| Maml3                                                        | mastermind like 3 (Drosophila)                                                      | 38.4           | 0.2            | 0.021            | 0.976            | ns                       | ns       |
| Numbl                                                        | numb-like                                                                           | 2.2            | -11.5          | 0.691            | 0.005            | 4.0                      | 2.4      |
| <b>Neuroactive ligand-receptor interaction</b>               |                                                                                     |                |                |                  |                  |                          |          |
| Taar7e                                                       | trace amine-associated receptor 7E                                                  | -1.8           | 24.1           | 0.935            | 0.028            | ns                       | ns       |
| Glr1                                                         | glycine receptor, alpha 1 subunit                                                   | 16.4           | 10.2           | 0.044            | 0.289            | 3.3                      | 1.8      |
| Gabra4                                                       | gamma-aminobutyric acid (GABA) A receptor, subunit alpha 4                          | -12.5          | -7.0           | 0.014            | 0.194            | ns                       | ns       |
| Drd5                                                         | dopamine receptor D5                                                                | -4.6           | -3.2           | 0.576            | 0.740            | ns                       | ns       |
| Gabra6                                                       | gamma-aminobutyric acid (GABA) A receptor, subunit alpha 6                          | -7.8           | 30.6           | 0.566            | 0.010            | ns                       | ns       |
| Grin1                                                        | glutamate receptor, ionotropic, NMDA1 (zeta 1)                                      | -0.8           | -3.8           | 0.632            | 0.000            | 3.3                      | 1.4      |
| Grin3b                                                       | glutamate receptor, ionotropic, NMDA3B                                              | -3.2           | 15.3           | 0.795            | 0.021            | ns                       | ns       |
| Gria3                                                        | glutamate receptor, ionotropic, AMPA3 (alpha 3)                                     | -7.5           | -5.1           | 0.000            | 0.430            | 5.8                      | 3.7      |
| Plg                                                          | plasminogen                                                                         | -12.2          | 40.0           | 0.549            | 0.004            | ns                       | ns       |
| Hcrtr1                                                       | hypocretin (orexin) receptor 1                                                      | -9.9           | 8.7            | 0.296            | 0.023            | ns                       | ns       |

| Symbol                                          | Description                                                               | % change<br>SD | % change<br>KT | t-test<br>Sal-SD | t-test<br>Sal-KT | Circadian value<br>(JTK) |          |
|-------------------------------------------------|---------------------------------------------------------------------------|----------------|----------------|------------------|------------------|--------------------------|----------|
|                                                 |                                                                           |                |                |                  |                  | -log (P)                 | -log (q) |
| P2ry10                                          | purinergic receptor P2Y, G-protein coupled 10                             | 62.9           | 38.2           | 0.012            | 0.023            | 3.0                      | 1.5      |
| Sstr2                                           | somatostatin receptor 2                                                   | 12.1           | 4.6            | 0.033            | 0.290            | ns                       | ns       |
| Grm3                                            | glutamate receptor, metabotropic 3                                        | -12.3          | -1.8           | 0.022            | 0.735            | 2.2                      | 1.4      |
| Adrb1                                           | adrenergic receptor, beta 1                                               | -8.5           | -7.0           | 0.097            | 0.021            | 2.8                      | 1.5      |
| Sstr3                                           | somatostatin receptor 3                                                   | 7.6            | 17.8           | 0.223            | 0.006            | 4.8                      | 2.2      |
| Gria2                                           | glutamate receptor, ionotropic, AMPA2 (alpha 2)                           | -3.7           | -2.4           | 0.021            | 0.570            | ns                       | ns       |
| Grin2c                                          | glutamate receptor, ionotropic, NMDA2C (epsilon 3)                        | 2.9            | -9.9           | 0.750            | 0.155            | 4.4                      | 2.2      |
| Galr3                                           | galanin receptor 3                                                        | 21.1           | 43.5           | 0.066            | 0.002            | ns                       | ns       |
| Hrh4                                            | histamine receptor H4                                                     | -2.6           | -11.9          | 0.818            | 0.003            | ns                       | ns       |
| Ghnr                                            | growth hormone secretagogue receptor                                      | 12.1           | 19.2           | 0.421            | 0.042            | ns                       | ns       |
| Nmbr                                            | neuromedin B receptor                                                     | 13.3           | 10.6           | 0.162            | 0.020            | ns                       | ns       |
| Ctsg                                            | cathepsin G                                                               | -0.7           | 26.2           | 0.961            | 0.046            | ns                       | ns       |
| Glp1r                                           | glucagon-like peptide 1 receptor                                          | 19.3           | 32.3           | 0.089            | 0.014            | ns                       | ns       |
| Htr5b                                           | 5-hydroxytryptamine (serotonin) receptor 5B                               | 32.8           | -2.0           | 0.009            | 0.781            | ns                       | ns       |
| <b>Glycine, serine and threonine metabolism</b> |                                                                           |                |                |                  |                  |                          |          |
| Alas2                                           | aminolevulinic acid synthase 2, erythroid                                 | 28.3           | 4.3            | 0.001            | 0.693            | ns                       | ns       |
| Gcat                                            | glycine C-acetyltransferase (2-amino-3-ketobutyrate-coenzyme A ligase)    | -8.5           | -6.7           | 0.003            | 0.277            | 6.4                      | 4.7      |
| Agxt2                                           | alanine-glyoxylate aminotransferase 2                                     | 0.2            | 16.1           | 0.989            | 0.010            | ns                       | ns       |
| Gnmt                                            | glycine N-methyltransferase                                               | -0.1           | 24.0           | 0.991            | 0.008            | 2.2                      | 1.4      |
| Sardh                                           | sarcosine dehydrogenase                                                   | 1.3            | 5.3            | 0.783            | 0.191            | 4.0                      | 2.0      |
| Cbs                                             | cystathionine beta-synthase                                               | 14.5           | -3.9           | 0.014            | 0.267            | 14.8                     | 12.0     |
| <b>MAPK signaling pathway</b>                   |                                                                           |                |                |                  |                  |                          |          |
| Mef2c                                           | myocyte enhancer factor 2C                                                | -9.7           | -7.2           | 0.022            | 0.189            | ns                       | ns       |
| Fgf5                                            | fibroblast growth factor 5                                                | -0.3           | -16.2          | 0.970            | 0.004            | ns                       | ns       |
| Grb2                                            | growth factor receptor bound protein 2                                    | 12.8           | 1.4            | 0.048            | 0.761            | ns                       | ns       |
| Fgf14                                           | fibroblast growth factor 14                                               | -15.0          | -7.8           | 0.009            | 0.116            | 3.7                      | 2.0      |
| Fgf17                                           | fibroblast growth factor 17                                               | -3.1           | 24.0           | 0.852            | 0.032            | 3.7                      | 2.0      |
| Fgf11                                           | fibroblast growth factor 11                                               | 12.5           | 5.7            | 0.046            | 0.403            | 3.8                      | 1.9      |
| Elk1                                            | ELK1, member of ETS oncogene family                                       | 22.3           | 0.9            | 0.013            | 0.823            | ns                       | ns       |
| Hspa1b                                          | heat shock protein 1B                                                     | 37.7           | -11.6          | 0.016            | 0.391            | 3.3                      | 2.2      |
| Mapkapk2                                        | MAP kinase-activated protein kinase 2                                     | 3.0            | -9.7           | 0.660            | 0.021            | 6.1                      | 3.7      |
| Ppm1b                                           | protein phosphatase 1B, magnesium dependent, beta isoform                 | -0.9           | -10.8          | 0.729            | 0.034            | 11.5                     | 9.2      |
| Hspa1l                                          | heat shock protein 1-like                                                 | 4.8            | 34.7           | 0.673            | 0.033            | 3.4                      | 1.9      |
| Nfatc4                                          | nuclear factor of activated T cells, cytoplasmic, calcineurin dependent 4 | 13.9           | 32.2           | 0.375            | 0.004            | 2.2                      | 1.4      |
| Fas                                             | Fas (TNF receptor superfamily member 6)                                   | 16.6           | 12.5           | 0.214            | 0.008            | 5.7                      | 3.8      |
| Fgf4                                            | fibroblast growth factor 4                                                | -2.1           | 15.1           | 0.764            | 0.018            | 3.1                      | 1.7      |
| Relb                                            | avian reticuloendotheliosis viral (v-rel) oncogene related B              | -4.6           | 8.5            | 0.365            | 0.021            | 3.6                      | 1.9      |
| Cacna2d3                                        | calcium channel, voltage-dependent, alpha2/delta subunit 3                | 13.2           | -13.6          | 0.012            | 0.042            | 3.9                      | 2.2      |
| Dusp5                                           | dual specificity phosphatase 5                                            | 15.1           | -27.7          | 0.191            | 0.010            | 2.6                      | 1.5      |
| Dusp1                                           | dual specificity phosphatase 1                                            | -5.6           | -11.2          | 0.542            | 0.007            | 4.6                      | 2.5      |
| Gadd45g                                         | growth arrest and DNA-damage-inducible 45 gamma                           | -22.2          | -20.2          | 0.127            | 0.003            | 3.6                      | 2.0      |
| Pla2g6                                          | phospholipase A2, group VI                                                | -7.0           | -4.9           | 0.118            | 0.012            | 5.1                      | 2.3      |
| Rap1b                                           | RAS related protein 1b                                                    | -2.6           | -9.7           | 0.754            | 0.022            | 5.3                      | 3.0      |
| Gadd45b                                         | growth arrest and DNA-damage-inducible 45 beta                            | -16.0          | -22.6          | 0.158            | 0.023            | 5.2                      | 2.8      |
| Dusp8                                           | dual specificity phosphatase 8                                            | -2.5           | -10.8          | 0.704            | 0.031            | ns                       | ns       |
| Ppp5c                                           | protein phosphatase 5, catalytic subunit                                  | -5.4           | -10.2          | 0.140            | 0.026            | 3.5                      | 1.4      |
| Dusp6                                           | dual specificity phosphatase 6                                            | 7.4            | -19.0          | 0.229            | 0.005            | 3.3                      | 1.5      |
| <b>Pathways in cancer</b>                       |                                                                           |                |                |                  |                  |                          |          |
| Bid                                             | BH3 interacting domain death agonist                                      | -0.8           | 9.6            | 0.894            | 0.039            | 4.9                      | 3.5      |
| Fgf5                                            | fibroblast growth factor 5                                                | -0.3           | -16.2          | 0.970            | 0.004            | ns                       | ns       |

| Symbol                                        | Description                                                                                                                        | % change<br>SD | % change<br>KT | t-test<br>Sal-SD | t-test<br>Sal-KT | Circadian value<br>(JTK) |          |
|-----------------------------------------------|------------------------------------------------------------------------------------------------------------------------------------|----------------|----------------|------------------|------------------|--------------------------|----------|
|                                               |                                                                                                                                    |                |                |                  |                  | -log (P)                 | -log (q) |
| Grb2                                          | growth factor receptor bound protein 2                                                                                             | 12.8           | 1.4            | 0.048            | 0.761            | ns                       | ns       |
| Fgf14                                         | fibroblast growth factor 14                                                                                                        | -15.0          | -7.8           | 0.009            | 0.116            | 3.7                      | 2.0      |
| Fgf17                                         | fibroblast growth factor 17                                                                                                        | -3.1           | 24.0           | 0.852            | 0.032            | 3.7                      | 2.0      |
| Fgf11                                         | fibroblast growth factor 11                                                                                                        | 12.5           | 5.7            | 0.046            | 0.403            | 3.8                      | 1.9      |
| Sufu                                          | suppressor of fused homolog (Drosophila)                                                                                           | 10.5           | 2.7            | 0.047            | 0.374            | 5.1                      | 2.7      |
| Lamb2                                         | laminin, beta 2                                                                                                                    | 5.1            | -6.4           | 0.123            | 0.035            | 3.8                      | 1.6      |
| Cdkn2a                                        | cyclin-dependent kinase inhibitor 2A                                                                                               | 3.4            | 10.9           | 0.650            | 0.034            | ns                       | ns       |
| Itgav                                         | integrin alpha V                                                                                                                   | -9.9           | -10.1          | 0.017            | 0.140            | 2.4                      | 1.4      |
| Nkx3-1                                        | NK-3 transcription factor, locus 1 (Drosophila)                                                                                    | 2.9            | 22.9           | 0.780            | 0.030            | ns                       | ns       |
| Flt3l                                         | FMS-like tyrosine kinase 3 ligand // FMS-like tyrosine kinase 3 ligand                                                             | 9.0            | 23.7           | 0.427            | 0.033            | 4.2                      | 2.7      |
| Fas                                           | Fas (TNF receptor superfamily member 6)                                                                                            | 16.6           | 12.5           | 0.214            | 0.008            | 5.7                      | 3.8      |
| Csf2ra                                        | colony stimulating factor 2 receptor, alpha, low-affinity (granulocyte-macrophage)                                                 | 6.8            | 13.3           | 0.048            | 0.048            | ns                       | ns       |
| Pik3r2                                        | phosphatidylinositol 3-kinase, regulatory subunit, polypeptide 2 (p85 beta)                                                        | -4.2           | -7.8           | 0.518            | 0.006            | 3.3                      | 1.8      |
| Fgf4                                          | fibroblast growth factor 4                                                                                                         | -2.1           | 15.1           | 0.764            | 0.018            | 3.1                      | 1.7      |
| Fn1                                           | fibronectin 1                                                                                                                      | 21.5           | -7.4           | 0.016            | 0.157            | 2.5                      | 1.5      |
| Cebpa                                         | CCAAT/enhancer binding protein (C/EBP), alpha                                                                                      | -8.0           | -2.6           | 0.036            | 0.759            | 8.0                      | 4.7      |
| Fzd9                                          | frizzled homolog 9 (Drosophila)                                                                                                    | -0.5           | 18.3           | 0.953            | 0.021            | 4.0                      | 2.2      |
| Dvl2                                          | dishevelled 2, dsh homolog (Drosophila)                                                                                            | -4.0           | 8.6            | 0.581            | 0.007            | 3.5                      | 1.9      |
| Wnt10b                                        | wingless related MMTV integration site 10b                                                                                         | -2.8           | 11.6           | 0.824            | 0.028            | 2.2                      | 1.4      |
| Flt3                                          | FMS-like tyrosine kinase 3                                                                                                         | -13.3          | -8.1           | 0.013            | 0.372            | 2.8                      | 1.6      |
| Birc5                                         | baculoviral IAP repeat-containing 5                                                                                                | 7.5            | 38.3           | 0.479            | 0.007            | ns                       | ns       |
| Rad51                                         | RAD51 homolog (S. cerevisiae)                                                                                                      | -9.4           | 8.2            | 0.470            | 0.001            | ns                       | ns       |
| Jup                                           | junction plakoglobin                                                                                                               | 22.3           | 2.7            | 0.004            | 0.632            | 2.3                      | 1.4      |
| Plcg1                                         | phospholipase C, gamma 1                                                                                                           | 12.5           | 4.1            | 0.039            | 0.569            | 4.0                      | 2.6      |
| Tceb2                                         | transcription elongation factor B (SIII), polypeptide 2                                                                            | -4.4           | -1.4           | 0.133            | 0.433            | 3.9                      | 1.4      |
| Ptch2                                         | patched homolog 2                                                                                                                  | 3.9            | 19.0           | 0.752            | 0.008            | 2.2                      | 1.4      |
|                                               |                                                                                                                                    |                |                |                  |                  |                          |          |
| <b>Cytokine-cytokine receptor interaction</b> |                                                                                                                                    |                |                |                  |                  |                          |          |
| Il18r1                                        | interleukin 18 receptor 1                                                                                                          | 0.3            | 23.4           | 0.955            | 0.018            | 8.0                      | 5.2      |
| Il2rb                                         | interleukin 2 receptor, beta chain                                                                                                 | 1.8            | 11.1           | 0.862            | 0.004            | 2.5                      | 1.4      |
| Acvr1l                                        | activin A receptor, type II-like 1                                                                                                 | 15.1           | 2.8            | 0.018            | 0.559            | 3.0                      | 1.4      |
| Osmr                                          | oncostatin M receptor                                                                                                              | 20.6           | -9.1           | 0.030            | 0.275            | ns                       | ns       |
| Flt3                                          | FMS-like tyrosine kinase 3                                                                                                         | -13.3          | -8.1           | 0.013            | 0.372            | 2.8                      | 1.6      |
| Gm2564                                        | predicted gene 2564 // predicted pseudogene 2457 // predicted gene 12407 // predicted gene 2023 // chemokine (C-C motif) ligand 19 | -0.5           | -15.1          | 0.954            | 0.021            | ns                       | ns       |
| Cntfr                                         | ciliary neurotrophic factor receptor                                                                                               | 17.7           | 12.8           | 0.089            | 0.026            | 8.5                      | 5.0      |
| Cx3cl1                                        | chemokine (C-X3-C motif) ligand 1                                                                                                  | 16.1           | 1.3            | 0.017            | 0.703            | 4.8                      | 2.5      |
| Cxcl11                                        | chemokine (C-X-C motif) ligand 11                                                                                                  | -3.4           | 31.6           | 0.785            | 0.019            | ns                       | ns       |
| Gm614                                         | predicted gene 614                                                                                                                 | 10.3           | 35.6           | 0.368            | 0.003            | ns                       | ns       |
| Amh                                           | anti-Mullerian hormone                                                                                                             | -15.5          | 14.5           | 0.033            | 0.198            | ns                       | ns       |
| Cxcl16                                        | chemokine (C-X-C motif) ligand 16                                                                                                  | 0.5            | -9.8           | 0.827            | 0.004            | 3.6                      | 2.1      |
| Ccr2                                          | chemokine (C-C motif) receptor 2                                                                                                   | 10.2           | 9.9            | 0.285            | 0.009            | 2.5                      | 1.3      |
| Cx3cr1                                        | chemokine (C-X3-C) receptor 1                                                                                                      | 0.7            | 4.7            | 0.881            | 0.027            | 3.9                      | 2.3      |
| Fas                                           | Fas (TNF receptor superfamily member 6)                                                                                            | 16.6           | 12.5           | 0.214            | 0.008            | 5.7                      | 3.8      |
| Pdgfd                                         | platelet-derived growth factor, D polypeptide                                                                                      | 2.9            | -10.1          | 0.694            | 0.033            | 4.0                      | 1.8      |
| Flt3l                                         | FMS-like tyrosine kinase 3 ligand // FMS-like tyrosine kinase 3 ligand                                                             | 9.0            | 23.7           | 0.427            | 0.033            | 4.2                      | 2.7      |
| Xcl1                                          | chemokine (C motif) ligand 1                                                                                                       | 9.6            | 18.7           | 0.535            | 0.023            | ns                       | ns       |
| Bmp7                                          | bone morphogenetic protein 7                                                                                                       | -2.1           | -7.1           | 0.621            | 0.003            | 3.0                      | 1.9      |
| Csf2ra                                        | colony stimulating factor 2 receptor, alpha, low-affinity (granulocyte-macrophage)                                                 | 6.8            | 13.3           | 0.048            | 0.048            | ns                       | ns       |
| Il2                                           | interleukin 2                                                                                                                      | 25.4           | 6.7            | 0.032            | 0.504            | ns                       | ns       |
|                                               |                                                                                                                                    |                |                |                  |                  |                          |          |
| <b>Circadian Clock</b>                        |                                                                                                                                    |                |                |                  |                  |                          |          |



| Symbol                     | Description                                                                 | % change SD | % change KT | t-test Sal-SD | t-test Sal-KT | Circadian value (JTK) |          |
|----------------------------|-----------------------------------------------------------------------------|-------------|-------------|---------------|---------------|-----------------------|----------|
|                            |                                                                             |             |             |               |               | -log (P)              | -log (q) |
| Gm129                      | Circadian-associated repressor of transcription                             | -33.1       | -15.6       | 0.009         | 0.003         | 11.5                  | 7.9      |
| Per1                       | period homolog 1 (Drosophila)                                               | 1.8         | -3.9        | 0.843         | 0.489         | 4.8                   | 3.4      |
| Per2                       | period homolog 2 (Drosophila)                                               | 1.2         | -9.3        | 0.927         | 0.074         | 18.0                  | 14.0     |
| Per3                       | period homolog 3 (Drosophila)                                               | -3.4        | -5.3        | 0.565         | 0.089         | 13.3                  | 8.9      |
| Arntl                      | aryl hydrocarbon receptor nuclear translocator-like                         | 14.3        | -7.4        | 0.091         | 0.287         | 18.7                  | 14.3     |
| Cry1                       | cryptochrome 1 (photolyase-like)                                            | -6.1        | -10.5       | 0.393         | 0.085         | 18.4                  | 14.9     |
| Cry2                       | cryptochrome 2 (photolyase-like)                                            | -3.4        | -7.2        | 0.595         | 0.131         | 8.5                   | 5.7      |
| Clock                      | circadian locomotor output cycles kaput                                     | 6.9         | -3.1        | 0.118         | 0.540         | 14.1                  | 11.4     |
| Npas1                      | neuronal PAS domain protein 1                                               | 4.8         | 0.1         | 0.318         | 0.984         | 3.3                   | 1.8      |
| Npas2                      | neuronal PAS domain protein 2                                               | 9.6         | -0.8        | 0.306         | 0.884         | 13.9                  | 10.2     |
| Npas3                      | neuronal PAS domain protein 3                                               | 3.3         | -6.8        | 0.742         | 0.367         | 2.7                   | 1.6      |
| Npas4                      | neuronal PAS domain protein 4                                               | -22.5       | -17.8       | 0.001         | 0.087         | 3.1                   | 1.5      |
| Dbp                        | D site albumin promoter binding protein                                     | -22.6       | 1.0         | 0.031         | 0.804         | 21.0                  | 16.4     |
| Rora                       | RAR-related orphan receptor alpha                                           | -2.4        | -11.7       | 0.540         | 0.238         | 6.5                   | 4.9      |
| Nr1d2                      | nuclear receptor subfamily 1, group D, member 2                             | -7.4        | -5.4        | 0.083         | 0.358         | 19.0                  | 14.3     |
| Rorb                       | RAR-related orphan receptor beta                                            | -20.9       | -6.2        | 0.054         | 0.486         | 4.6                   | 2.0      |
| <b>Cholinergic synapse</b> |                                                                             |             |             |               |               |                       |          |
| Camk2g                     | calcium/calmodulin-dependent protein kinase II gamma                        | -10.0       | -5.8        | 0.000         | 0.146         | 11.5                  | 7.9      |
| Camk4                      | calcium/calmodulin-dependent protein kinase IV                              | -9.4        | -10.9       | 0.053         | 0.219         | ns                    | ns       |
| Chrn2                      | cholinergic receptor, nicotinic, beta polypeptide 2 (neuronal)              | -11.8       | -4.7        | 0.013         | 0.057         | ns                    | ns       |
| Chrn2                      | cholinergic receptor, nicotinic, beta polypeptide 2 (neuronal)              | -11.8       | -4.7        | 0.013         | 0.057         | 4.4                   | 2.2      |
| Creb3l3                    | cAMP responsive element binding protein 3-like 3                            | 4.2         | 29.9        | 0.770         | 0.040         | 3.4                   | 2.2      |
| Fos                        | FBJ osteosarcoma oncogene                                                   | -23.9       | -25.9       | 0.008         | 0.007         | 5.3                   | 2.3      |
| Gng3                       | guanine nucleotide binding protein (G protein), gamma 3                     | -4.7        | 12.8        | 0.510         | 0.077         | 2.2                   | 1.4      |
| Itpr2                      | inositol 1,4,5-triphosphate receptor 2                                      | -0.4        | -7.1        | 0.961         | 0.031         | 5.1                   | 3.4      |
| Kcnj3                      | potassium inwardly-rectifying channel, subfamily J, member 3                | -13.2       | -4.0        | 0.003         | 0.442         | 6.8                   | 4.4      |
| Kcnq2                      | potassium voltage-gated channel, subfamily Q, member 2                      | 16.1        | -1.1        | 0.063         | 0.732         | ns                    | ns       |
| Kcnq4                      | potassium voltage-gated channel, subfamily Q, member 4                      | -5.1        | 14.5        | 0.059         | 0.022         | ns                    | ns       |
| Kcnq5                      | potassium voltage-gated channel, subfamily Q, member 5                      | -6.4        | -7.0        | 0.049         | 0.199         | 2.9                   | 1.7      |
| Pik3r2                     | phosphatidylinositol 3-kinase, regulatory subunit, polypeptide 2 (p85 beta) | -4.2        | -7.8        | 0.518         | 0.006         | 3.3                   | 1.8      |
| Plcb4                      | phospholipase C, beta 4                                                     | -9.8        | -13.3       | 0.072         | 0.181         | 5.5                   | 3.5      |

Supplemental Table S3. Primers used in the real-time PCR

| Gene names                                      | Symbol  | MGI accession | Forward                   | Reverse                  |
|-------------------------------------------------|---------|---------------|---------------------------|--------------------------|
| RAR-related orphan receptor beta                | Rorb    | MGI:1343464   | GGCAGACCCACACCTACGA       | CAGAGCCTCCCTGGACTTG      |
| D site albumin promoter binding protein         | Dbp     | MGI:94866     | AATGACCTTTGAACCTGATCCCGCT | GCTCCAGTACTTCTATCCTTCTGT |
| Neuronal PAS Domain Protein 2                   | Npas2   | MGI:109232    | CACTCGGAAAATGGACAAAACC    | TGAGACTTCATTGTGTTTCTGCAA |
| Period circadian clock 1                        | Per1    | MGI:1098283   | CCTCCAGAGCAGCCATCC        | GCCTGAAGCGGTTGACATC      |
| Cryptochrome 2                                  | Cry2    | MGI:1270859   | CAACACAGGCCCGAGCACTATC    | TCAGGAGTCCTTGCTGCTGCTC   |
| Neuronal PAS Domain Protein 4                   | Npas4   | MGI:2664186   | ACTACCCTATCAGTGACACG      | CTAGGACATAGGCTGCCTG      |
| Period circadian clock 2                        | Per2    | MGI:1195265   | CGCCTAGAATCCCTCCTGAGA     | CCACC GGCTGTAGGATCT      |
| Circadian Associated Repressor Of Transcription | Clart   | MGI:2684975   | AAGCAAGCACTTTCCAG         | GTGTTTGGCCCATCTTCTC      |
| Neurogenic locus notch homolog protein 2        | Notch 2 | MGI:97364     | CCTGAACGGGCAGTACATTT      | GCGTAGCCCTTCAGACACTC     |
| Beta actin                                      | Actinb  | MGI:87904     | GGCTGTATCCCTCCATCG        | CCAGTTGGTAACAATGCCATGT   |
